# Supplementary material for: Long-term risks and benefits associated with cesarean delivery for mother, baby, and subsequent pregnancies: Systematic review and meta-analysis
Source: PubMed Central journal article supplement (PMC5779640; doi:10.1371/journal.pmed.1002494), 2018-01-23
Supplement: pmed.1002494.s001.pdf [file pmed.1002494.s001.pdf]

## PROSPERO International prospective register of systematic reviews

---

### The long-term consequences of caesarean section for mother, baby and subsequent pregnancies: a systematic review and meta-analysis

*Oonagh Keag, Sarah Stock, Jane Norman*

---

#### Citation

Oonagh Keag, Sarah Stock, Jane Norman. The long-term consequences of caesarean section for mother, baby and subsequent pregnancies: a systematic review and meta-analysis. PROSPERO 2014:CRD42014007006 Available from [http://www.crd.york.ac.uk/PROSPERO\\_REBRANDING/display\\_record.asp?ID=CRD42014007006](http://www.crd.york.ac.uk/PROSPERO_REBRANDING/display_record.asp?ID=CRD42014007006)

#### Review question(s)

What are the long-term consequences of caesarean section for mother, baby and subsequent pregnancies when compared to vaginal delivery?

#### Searches

We will search the following electronic bibliographic databases: MEDLINE, EMBASE, The Cochrane Library (Cochrane Central Register of Controlled Trials (CENTRAL), Cochrane Database of Systematic Reviews, Database of Abstracts of Reviews of Effects (DARE)) and the Cumulative Index to Nursing and Allied Health Literature (CINAHL).

The search strategy will be developed and tested by the review team in collaboration with a librarian experienced in literature searching. The search will be limited to human studies, randomised controlled trials and cohort studies. There will be no date or language restrictions. The searches will be re-run just before the final analyses and further studies retrieved for inclusion. A manual search of all appropriate references (identified as relevant from their citation within the article) cited in included studies and identified review articles will be performed. Abstracts for all studies will be obtained for assessment and inclusion will be determined using the criteria outlined below.

#### Types of study to be included

Inclusion will be restricted to all randomized controlled trials and large (more than 1000 participants) prospective cohort studies with a follow-up time of greater than one year following delivery.

#### Condition or domain being studied

Rates of caesarean section (CS) continue to rise in the UK. For nulliparous women the rate of CS is 25%, and an increasing proportion of women are being delivered by CS for maternal request when there is no medical or obstetric reason. NICE have synthesized evidence on the short-term adverse effects of CS for mother and baby and endorse the concept of CS for maternal request. However, the long-term consequences of CS for mother, baby and for subsequent pregnancies are less frequently discussed with women. Future pregnancy risks include increased rates of placenta praevia, accreta, uterine rupture and stillbirth, and for children born by CS, increased rates of obesity and asthma. The aim of this review is to bring all the evidence together so that clinicians can provide appropriate information for women to make an informed decision about CS.

#### References:

Bragg F et al. Variation in rates of caesarean section among English NHS trusts after accounting for maternal and clinical risk: cross sectional study. *BMJ* 2010; 341: 5065

RCOG Clinical Effectiveness Support Unit. National Sentinel Caesarean Section Audit Report. London: RCOG; 2001

Gurol-Urganci I et al. Risk of placenta previa in second birth after first birth cesarean section: a population-based study and meta-analysis. *BMC Pregnancy Childbirth* 2011; 11: 95

---

Jauniaux E, Jurkovic K. Placenta accrete: pathogenesis of a 20th century iatrogenic uterine disease. *Placenta* 2012; 33(4): 244-51

Fitzpatrick KE et al. Uterine rupture by intended mode of delivery in the UK: a national case-control study. *PLoS Med* 2012; 9(3): e1001184

Smith GC, Pell JP, Dobbie R. Caesarean section and risk of unexplained stillbirth in subsequent pregnancy. *Lancet* 2003; 362(9398): 1779-84

Huh SY et al. Delivery by caesarean section and risk of obesity in preschool age children: a prospective cohort study. *Arch Dis Child Fetal Neonatal Ed* 2012

Magnus MC et al. Delivery by cesarean section and early childhood respiratory symptoms and disorders: the Norwegian mother and child cohort study. *Am J Epidemiol* 2011; 174 (11): 1275-85

### **Participants/ population**

Women with a delivery at term (>37 weeks gestational age) with outcomes assessed in one or more of the following categories:

1. Maternal outcomes at 1 year or more following delivery.
2. Childhood outcomes at 1 year or more following delivery.
3. Outcomes in subsequent pregnancies (to the end of the neonatal period).

### **Intervention(s), exposure(s)**

Delivery by caesarean section.

### **Comparator(s)/ control**

Vaginal delivery.

### **Context**

The review will include all eligible studies identified that report long-term outcomes ie those occurring more than 12 months after the index delivery. Three areas will be looked at:

1. Long-term maternal outcomes after caesarean section.
2. Long-term outcomes in children delivered by caesarean section.
3. Outcomes in subsequent pregnancy after caesarean section.

### **Outcome(s)**

#### **Primary outcomes**

For mother: Pelvic floor dysfunction (any of urinary incontinence, fecal incontinence, uterine prolapse, vaginal prolapse).

For baby: Asthma.

For subsequent pregnancies: Perinatal death.

#### **Secondary outcomes**

For mother: Death, chronic pain, dysmenorrhoea, menorrhagia, sexual dysfunction, healthcare usage, subfertility.

For baby: Obesity, atopy, wheeze, hypersensitivity, dermatitis, inflammatory bowel disease.

For subsequent pregnancies: placenta praevia, placenta accreta, placental abruption, uterine rupture, hysterectomy,

ante-partum haemorrhage, post-partum haemorrhage, stillbirth, miscarriage, ectopic pregnancy, fetal growth restriction, preterm labour.

### **Data extraction, (selection and coding)**

Titles and abstracts (where available) of studies identified from the initial searches will be independently assessed by two reviewers for possible inclusion [OK and SS]. The full text of all potentially eligible studies that have been identified will then be appraised by two assessors independently [OK and SS]. Where there is disagreement over eligibility for inclusion, this will be referred to a meeting of all authors. Data will be extracted independently onto the RevMan programme by both assessors [OK and SS]. Quality of the included studies will be assessed using standard criteria, looking for potential bias [OK and SS].

The following data will be extracted for each study: study design, setting, dates and size of cohort, details of intervention (mode of delivery), exclusion criteria, recruitment and study completion rates, outcome measurements, length of follow-up, definition of the outcome used, list of confounders adjusted for.

Missing data will be requested from study authors by OK.

### **Risk of bias (quality) assessment**

Each study will be assessed independently by OK and SS using the Scottish Intercollegiate Guidelines Network Methodology Checklist. Discrepancies will be resolved by group discussion. Studies will be ranked as good (++), fair (+) or poor (0).

### **Strategy for data synthesis**

Data collected will be systematised into a table. All studies identified in the systematic review will be included in the table whether or not they are included in the meta-analysis. Where studies are comparable on the basis of study population, intervention and outcome measure, the results will be pooled in a fixed-effects meta-analysis, with mean differences, 95% confidence intervals and two sided p-values. Heterogeneity will be assessed using the Chi-squared test and calculation of I-squared, an estimate of the proportion of variance due to between-study heterogeneity. Where evidence of heterogeneity is present (p-value from Chi-squared test <0.05) a random effects meta-analysis will be used. Where between-study heterogeneity is very high (I-squared over 80%) and is not explained through differences in study characteristics we will re-consider whether quantitative data synthesis is appropriate.

### **Analysis of subgroups or subsets**

Sensitivity analysis where applicable by:

1. study quality (good or fair quality only).
2. by cohort size (> 50 000).
3. by GDP of country of publication (top two thirds, bottom third of International Monetary Fund list).
4. by study period (post-1980).

### **Dissemination plans**

The results of this review will be presented at meetings of relevant societies and interest groups. It will be written up for peer-reviewed publication.

### **Contact details for further information**

Oonagh Keag

C/O Dr Sarah Stock

MRC Centre for Reproductive Health

Room W1.17

Queen's Medical Research Institute

Little France

Edinburgh

EH16 4SA

oonaghkeag@nhs.net

**Organisational affiliation of the review**

Simpson Centre for Reproductive Health, Edinburgh

**Review team**

Dr Oonagh Keag, Simpson Centre for Reproductive Health

Dr Sarah Stock, MRC Centre for Reproductive Health, University of Edinburgh Queen's Medical Research Institute

Professor Jane Norman, MRC Centre for Reproductive Health, University of Edinburgh Queen's Medical Research Institute

**Collaborators**

Mrs Sheila Fiskien, University of Edinburgh

**Anticipated or actual start date**

31 January 2014

**Anticipated completion date**

31 July 2014

**Funding sources/sponsors**

Supported by Tommy's

**Conflicts of interest**

The authors are writing a Scientific Impact Paper for the Royal College of Obstetricians and Gynaecologists on this topic.

**Language**

English

**Country**

Scotland

**Subject index terms status**

Subject indexing assigned by CRD

**Subject index terms**

Cesarean Section; Female; Humans; Maternal Age; Pregnancy; Risk Factors; Surgical Procedures, Elective

**Stage of review**

Ongoing

**Date of registration in PROSPERO**

12 February 2014

**Date of publication of this revision**

12 February 2014

**DOI**

10.15124/CRD42014007006

| <b>Stage of review at time of this submission</b>               | <b>Started</b> | <b>Completed</b> |
|-----------------------------------------------------------------|----------------|------------------|
| Preliminary searches                                            | Yes            | No               |
| Piloting of the study selection process                         | No             | No               |
| Formal screening of search results against eligibility criteria | No             | No               |
| Data extraction                                                 | No             | No               |
| Risk of bias (quality) assessment                               | No             | No               |
| Data analysis                                                   | No             | No               |

---

**PROSPERO**

**International prospective register of systematic reviews**

The information in this record has been provided by the named contact for this review. CRD has accepted this information in good faith and registered the review in PROSPERO. CRD bears no responsibility or liability for the content of this registration record, any associated files or external websites.

---
