# Supplementary material for: Long-term risks and benefits associated with cesarean delivery for mother, baby, and subsequent pregnancies: Systematic review and meta-analysis
Source: PubMed Central journal article supplement (PMC5779640; doi:10.1371/journal.pmed.1002494), 2018-01-23

**S15 Figure: A random effects meta-analysis of obesity in children up to 5 years old after cesarean delivery compared to vaginal delivery**

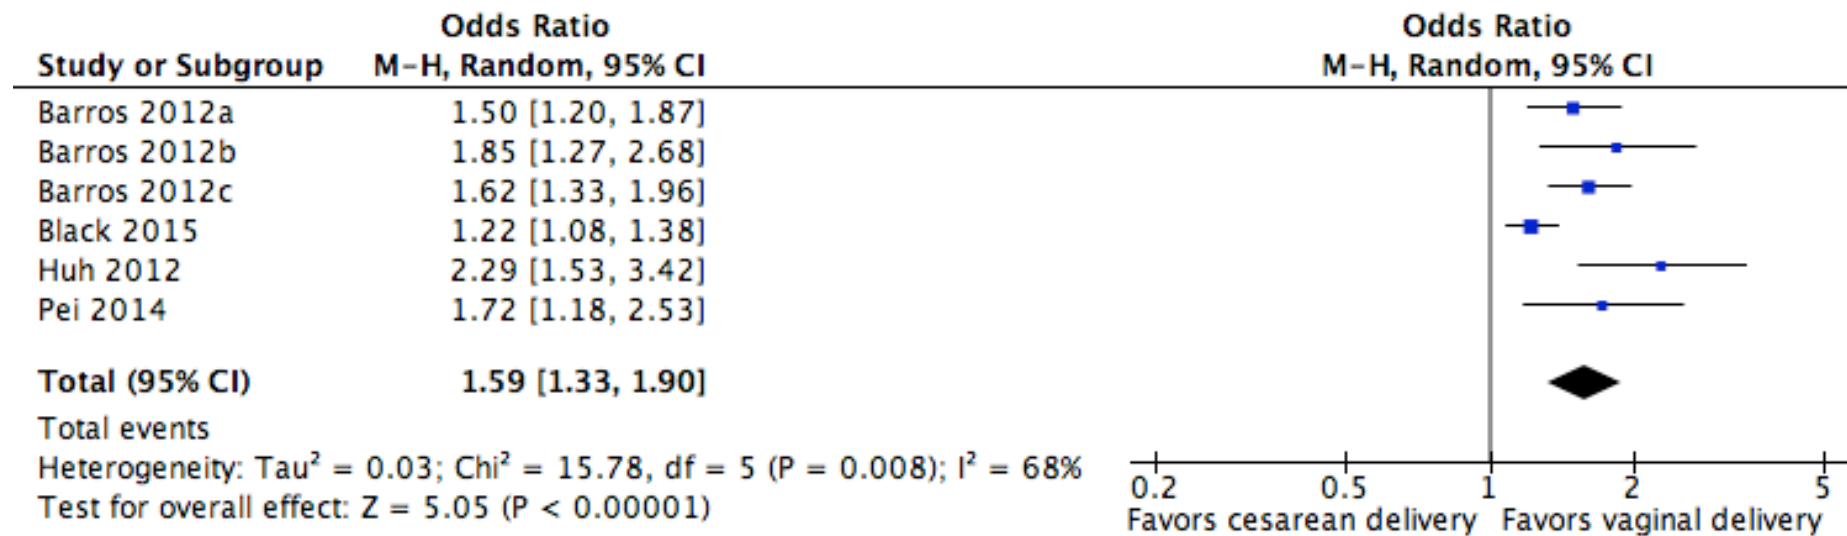

Supplement: pmed.1002494.s024.pdf [file pmed.1002494.s024.pdf]
