# Supplementary material for: Long-term risks and benefits associated with cesarean delivery for mother, baby, and subsequent pregnancies: Systematic review and meta-analysis
Source: PubMed Central journal article supplement (PMC5779640; doi:10.1371/journal.pmed.1002494), 2018-01-23

**S30 Figure: A random effects meta-analysis of preterm labor in pregnancy after cesarean delivery compared to pregnancy after vaginal delivery**

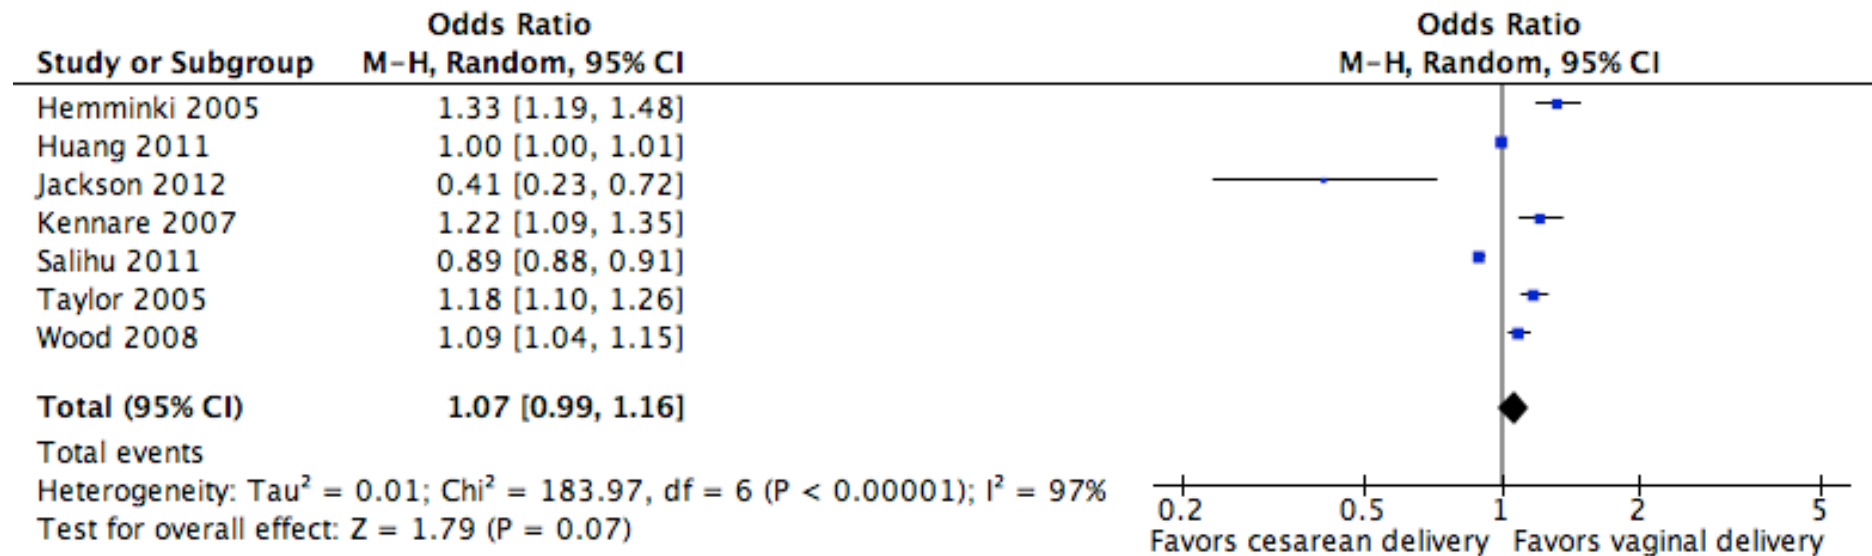

Supplement: pmed.1002494.s039.pdf [file pmed.1002494.s039.pdf]
