# Supplementary material for: Long-term risks and benefits associated with cesarean delivery for mother, baby, and subsequent pregnancies: Systematic review and meta-analysis
Source: PLOS journal article supplement (doi:10.1371/journal.pmed.1002494), 2018-01-23

**S4 Figure: A random effects meta-analysis of urinary incontinence after cesarean delivery compared to vaginal delivery**

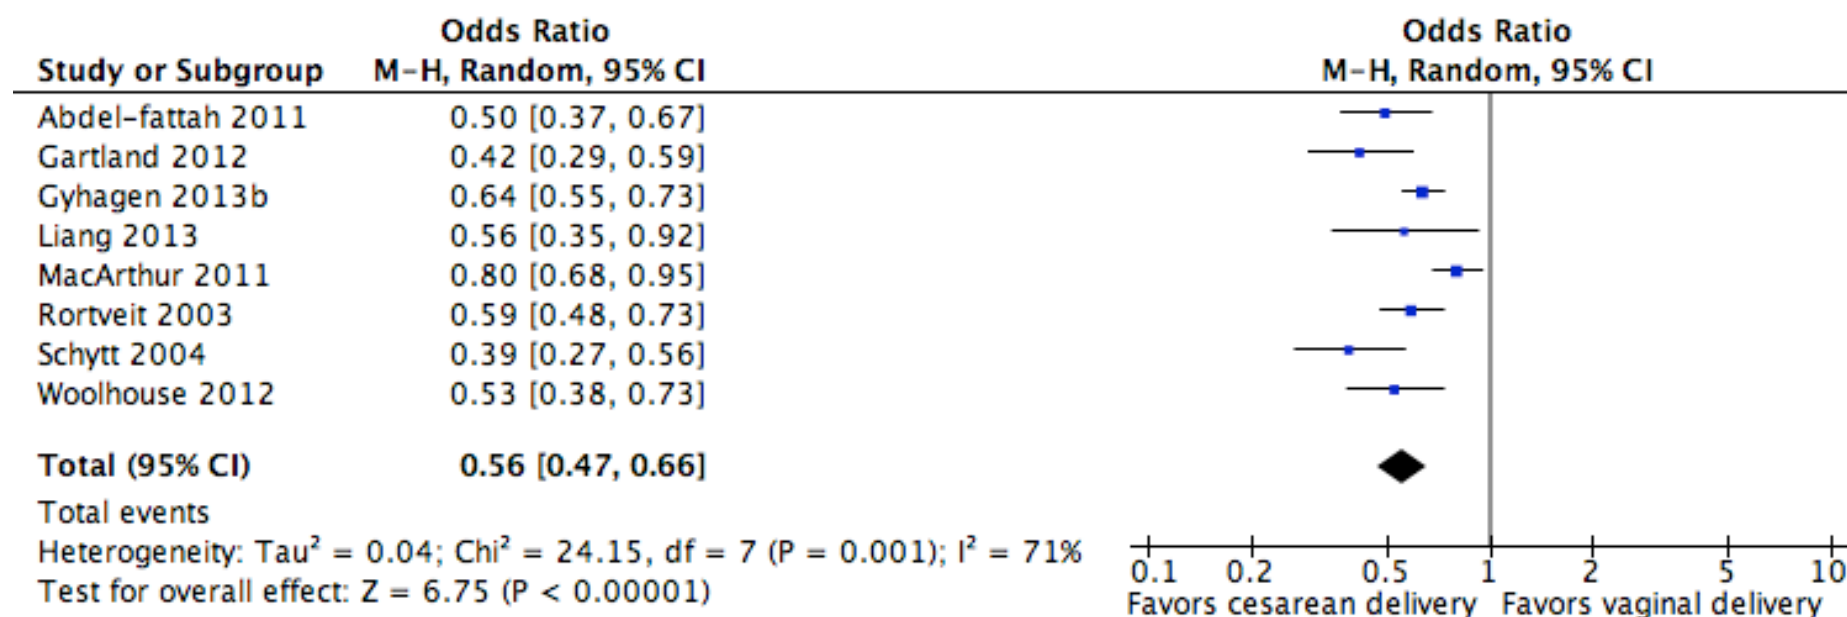

Supplement: S13 (10.1371/journal.pmed.1002494.s013) [file journal.pmed.1002494.s013]
