# Supplementary material for: Long-term risks and benefits associated with cesarean delivery for mother, baby, and subsequent pregnancies: Systematic review and meta-analysis
Source: PLOS journal article supplement (doi:10.1371/journal.pmed.1002494), 2018-01-23

**S25 Figure: A fixed effects meta-analysis of ectopic pregnancy after cesarean delivery compared to pregnancy after vaginal delivery**

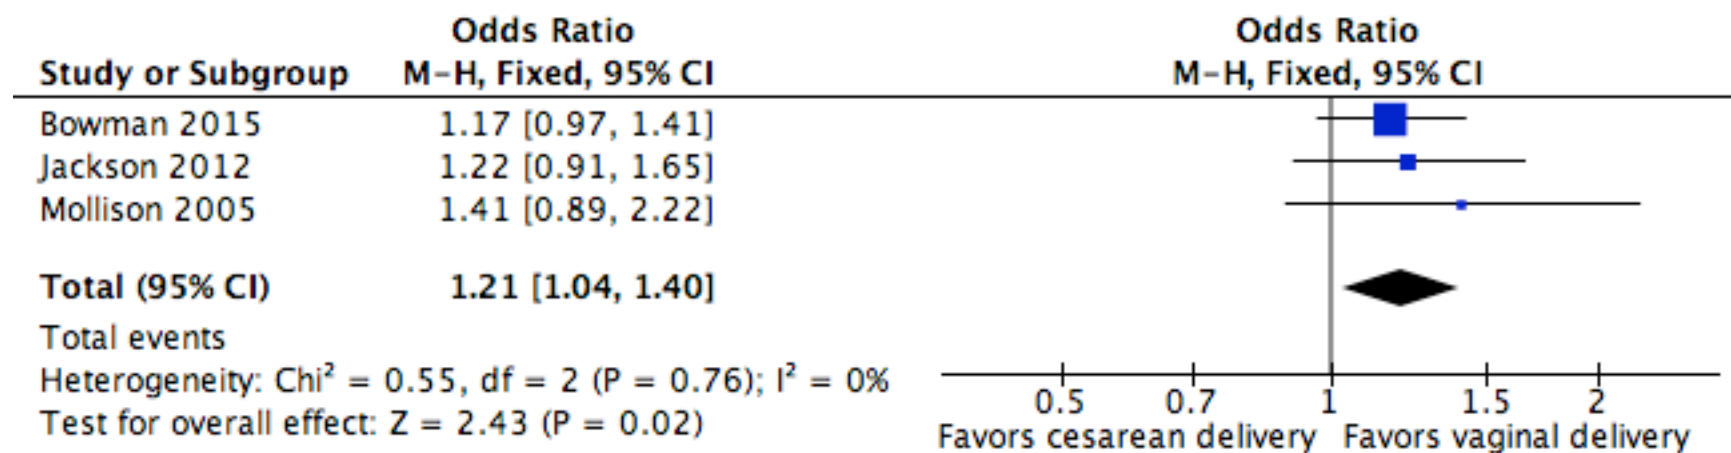

Supplement: S34 (10.1371/journal.pmed.1002494.s034) [file journal.pmed.1002494.s034]
